# Supplementary material for: Effects of Dietary Protein Source and Quantity on Bone Morphology and Body Composition Following a High-Protein Weight-Loss Diet in a Rat Model for Postmenopausal Obesity
Source: MDPI journal article supplement (doi:10.3390/nu14112262), 2022-05-28
Supplement: s1 [file s1]

**Supplemental Table S1:** High Fat, High Sugar Diet  
Formulation<sup>1</sup>

|                              | High Fat, High Sugar (g) |
|------------------------------|--------------------------|
| <b><u>Protein Source</u></b> |                          |
| Casein                       | 140                      |
| L-Cysteine                   | 1.8                      |
| <b><u>Carbohydrates</u></b>  |                          |
| Corn Starch                  | 21.5                     |
| Maltodextrin 10              | 125                      |
| Sucrose                      | 223                      |
| Cellulose                    | 50                       |
| <b><u>Fat</u></b>            |                          |
| Soybean Oil                  | 40                       |
| Lard                         | 146                      |
| TBHQ                         | 0.008                    |
| <b><u>Micronutrients</u></b> |                          |
| Mineral Mix S10022M          | 35                       |
| Vitamin Mix V10037           | 10                       |
| Choline Bitartrate           | 2.5                      |
| Energy, kcal g               | 4.6                      |
| Protein, % kcal              | 14                       |
| Carbohydrate, % kcal         | 41                       |
| Fat, % kcal                  | 45                       |

<sup>1</sup>TBHQ: tert-Butylhydroquinone, Research Diets Inc: D15053103

**Supplemental Table S2.** Nutritional Analysis of Freeze-Dried Lean Beef Powder<sup>1</sup>

| <u>Amino Acid Profile*</u> |       | <u>Fatty Acid Profile (% of Total Fat)</u> |       |
|----------------------------|-------|--------------------------------------------|-------|
| Taurine                    | 0.14  | Myristic (14:0)                            | 2.60  |
| Aspartic Acid              | 0.26  | Myristoleic (9c-14:1)                      | 0.73  |
| Threonine                  | 7.29  | C15:0                                      | 0.38  |
| Serine                     | 3.50  | Palmitic (16:0)                            | 23.37 |
| Glutamic Acid              | 2.75  | Palmitoleic (9c-16:1)                      | 3.37  |
| Proline                    | 12.17 | Margaric (17:0)                            | 1.17  |
| Glycine                    | 2.94  | 10c-17:1                                   | 0.00  |
| Alanine                    | 0.00  | Stearic (18:0)                             | 11.96 |
| Cysteine                   | 3.57  | Elaidic (9t-18:1)                          | 0.44  |
| Valine                     | 4.54  | Oleic (9c-18:1)                            | 41.31 |
| Methionine                 | 0.82  | Vaccenic (11c-18:1)                        | 0.00  |
| Isoleucine                 | 4.16  | Linoleic (18:2n6)                          | 3.83  |
| Leucine                    | 2.13  | Linolenic (18:3n3)                         | 0.18  |
| Tyrosine                   | 3.94  | Stearidonic (18:4n3)                       | 0.00  |
| Phenylalanine              | 6.57  | Arachidic (20:0)                           | 0.10  |
| Ornithine                  | 3.50  | Gonodic (20:1n9)                           | 0.71  |
| Lysine                     | 3.33  | Homo-a-linolenic(20:3n3)                   | 0.00  |
| Histidine                  | 0.12  | Arachidonic [20:4n6]                       | 0.68  |
| Arginine                   | 0.03  | 3n-Arachidonic (20:4n3)                    | 0.04  |
| Tryptophan                 | 7.19  | EPA (20:5n3)                               | 0.00  |
| Total Amino Acid           | 77.92 | Behenoic (22:0)                            | 0.22  |
|                            |       | Erucic [22:1n9]                            | 0.00  |
| Crude Protein*             | 75.27 | Clupanodonic (22:5n3)                      | 0.18  |
| Crude Total Fat            | 16.94 | DHA (22:6n3)                               | 0.02  |
| Percent Fat <sup>#</sup>   | 5.6%  | Lignoceric (24:0)                          | 0.01  |
| Ash                        | 3.64  | Nervonic (24:1n9)                          | 0.00  |

<sup>1</sup>Grams per 100g Freeze-dried beef; \*Percentage Nitrogen X 6.25, includes all nitrogen compounds;<sup>#</sup>Calculated from the fresh, unfreeze-dried sample

**Supplemental Table S3.** Main effect of weight loss on bone microarchitecture following 12-weeks of energy restriction<sup>1</sup>

|                                         | Baseline      | Weight Loss Effect <sup>2</sup> | Diet Effect <sup>2</sup> |                  |                  |                 |
|-----------------------------------------|---------------|---------------------------------|--------------------------|------------------|------------------|-----------------|
| <u>Distal Metaphysis</u>                |               |                                 |                          |                  |                  |                 |
| VcaBMD (mg HA/ccm)                      | 800 ± 10      | 0.488                           | NP-Control<br>0.431      | HP-Beef<br>0.569 | HP-Milk<br>0.578 | HP-Soy<br>0.816 |
| Tb BMC (mg HA x 10 <sup>2</sup> )       | 1.94 ± 0.28   | <0.0001                         | <0.0001                  | <0.0001          | <0.0001          | <0.0001         |
| BV/TV x 10 <sup>2</sup>                 | 23.58 ± 3.71  | <0.0001                         | <0.0001                  | <0.0001          | <0.0001          | <0.0001         |
| Tb.N (mm <sup>-1</sup> )                | 2.26 ± 0.39   | <0.001                          | <0.001                   | 0.001            | 0.003            | 0.015           |
| Tb.Th (mm)                              | 0.11 ± 0.01   | 0.859                           | 0.996                    | 0.847            | 0.989            | 0.997           |
| Tb.Sp (mm)                              | 0.49 ± 0.08   | 0.019                           | 0.108                    | 0.009            | 0.267            | 0.597           |
| SMI                                     | 1.34 ± 0.25   | 0.001                           | 0.025                    | <0.001           | 0.005            | 0.067           |
| Conn.D (mm <sup>3</sup> ) <sup>-1</sup> | 46.79 ± 10.67 | <0.0001                         | <0.0001                  | <0.0001          | <0.0001          | <0.0001         |
| <u>Midshaft Diaphysis</u>               |               |                                 |                          |                  |                  |                 |
| VctBMD (mg HA/ccm)                      | 1300 ± 5      | 0.109                           | 0.999                    | 0.999            | 0.996            | 0.449           |
| TA (mm <sup>2</sup> )                   | 9.86 ± 0.44   | 0.164                           | 0.539                    | 0.343            | 0.679            | 0.108           |
| Ct.A (mm <sup>2</sup> )                 | 6.68 ± 0.30   | 0.906                           | 0.880                    | 0.995            | 0.960            | 0.968           |
| Ct.A/TA                                 | 0.68 ± 0.04   | 0.067                           | 0.119                    | 0.189            | 0.282            | 0.036           |
| Ma.Ar (mm <sup>2</sup> )                | 3.38 ± 0.34   | 0.065                           | 0.210                    | 0.189            | 0.391            | 0.033           |
| Ct.Th (mm)                              | 0.69 ± 0.03   | 0.179                           | 0.195                    | 0.754            | 0.340            | 0.197           |
| pMOI (mm <sup>4</sup> )                 | 15.99 ± 1.10  | 0.786                           | 0.977                    | 0.980            | 0.908            | 0.746           |
| <u>Vertebral Body</u>                   |               |                                 |                          |                  |                  |                 |
| VcaBMD (mg HA/ccm)                      | 923 ± 11      | 0.957                           | 0.954                    | 0.972            | 0.996            | 0.998           |
| Tb BMC (mg HA x 10 <sup>2</sup> )       | 32.51 ± 16.26 | 0.128                           | 0.249                    | 0.068            | 0.348            | 0.310           |
| BV/TV x 10 <sup>2</sup>                 | 40.04 ± 5.26  | 0.106                           | 0.173                    | 0.059            | 0.359            | 0.235           |
| Tb.N (mm <sup>-1</sup> )                | 3.55 ± 0.43   | 0.328                           | 0.492                    | 0.225            | 0.458            | 0.467           |
| Tb.Th (mm)                              | 0.108 ± 0.005 | 0.328                           | 0.765                    | 0.263            | 0.925            | 0.814           |
| Tb.Sp (mm)                              | 0.273 ± 0.035 | 0.437                           | 0.769                    | 0.317            | 0.826            | 0.772           |
| SMI                                     | 0.33 ± 0.16   | 0.162                           | 0.998                    | 0.523            | 0.998            | 0.957           |
| Conn.D (mm <sup>3</sup> ) <sup>-1</sup> | 45.51 ± 3.84  | 0.555                           | 0.936                    | 0.829            | 0.598            | 0.550           |

<sup>1</sup>Mean ± SEM. Conn.D, connectivity density; Ct.A/TA, cortical area fraction; Ct.A, cortical bone area; Ct.Th, cortical thickness; pMOI, polar moment of inertia; Ma.Ar, marrow area; SMI, structural model index; TA, total area; Tb BMC, trabecular BMC; Tb.N, trabecular bone number; Tb.Sp, trabecular bone separation; Tb.Th, trabecular bone thickness; BV/TV; trabecular bone volume fraction; VcaBMD, volumetric cancellous BMD; VctBMD, volumetric cortical BMD

<sup>2</sup>Two-Way ANOVA: Main effect of Weight Loss & Diet. Significance denoted by bolding (p<0.05); Post-hoc analysis utilized Tukey's HSD
